# Supplementary material
Source: bioRxiv or medRxiv preprint supplement (https://www.biorxiv.org/highwire/filestream/34934/field_highwire_adjunct_files/0/119495-1.pdf)
Supplement: Supplementary file [file 119495-1.pdf]

c

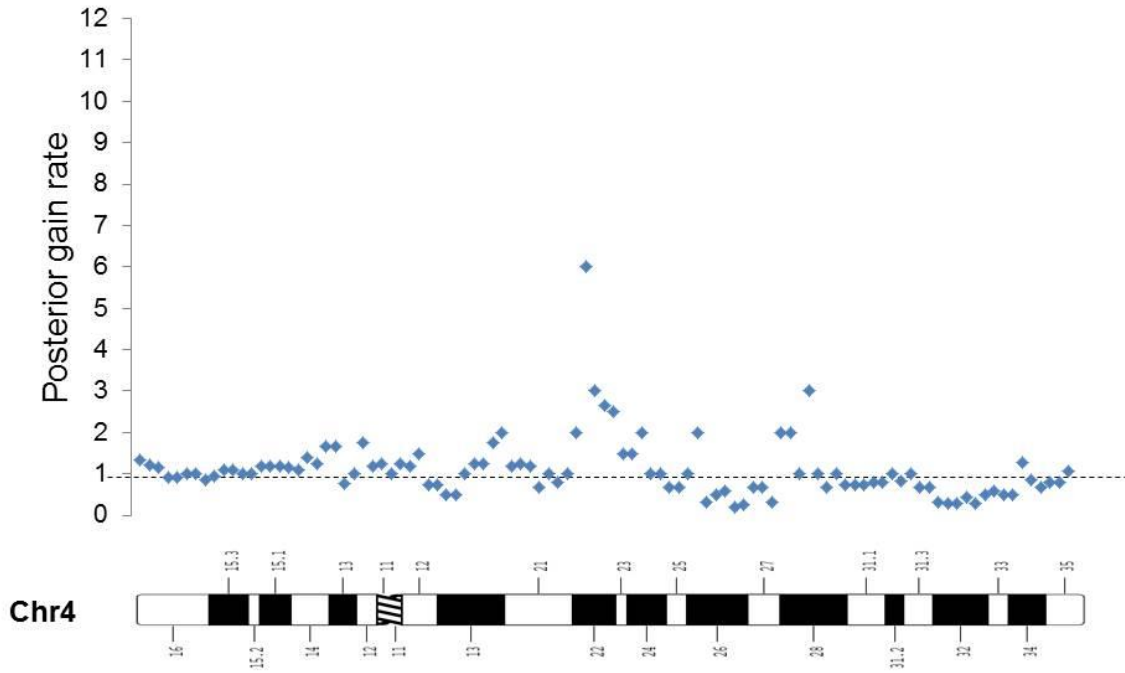

d

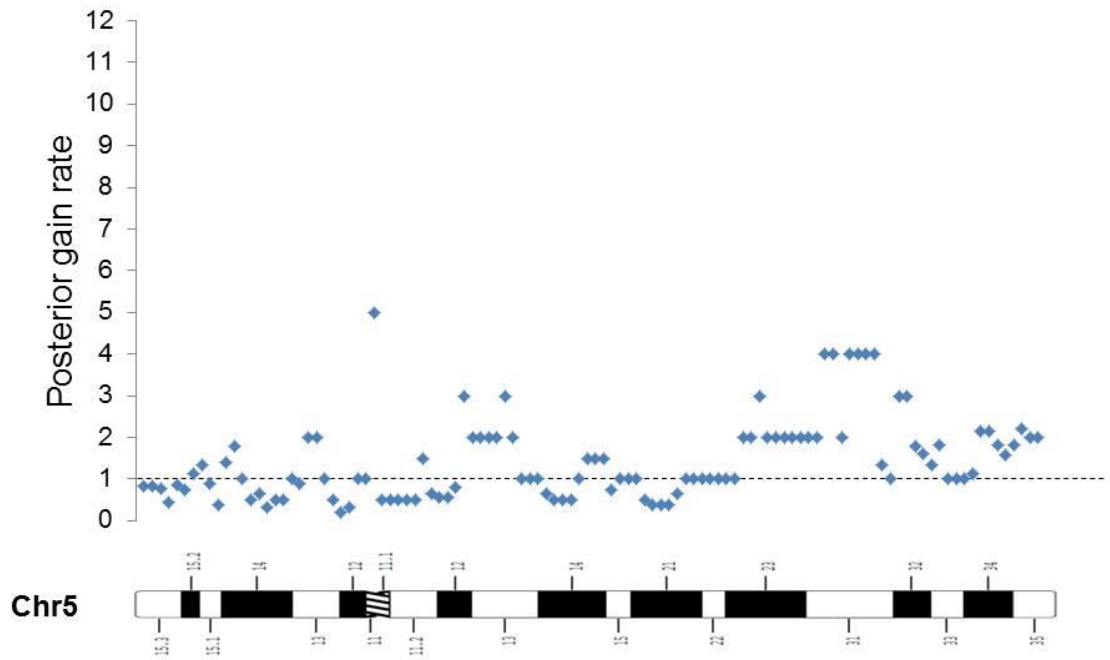

e

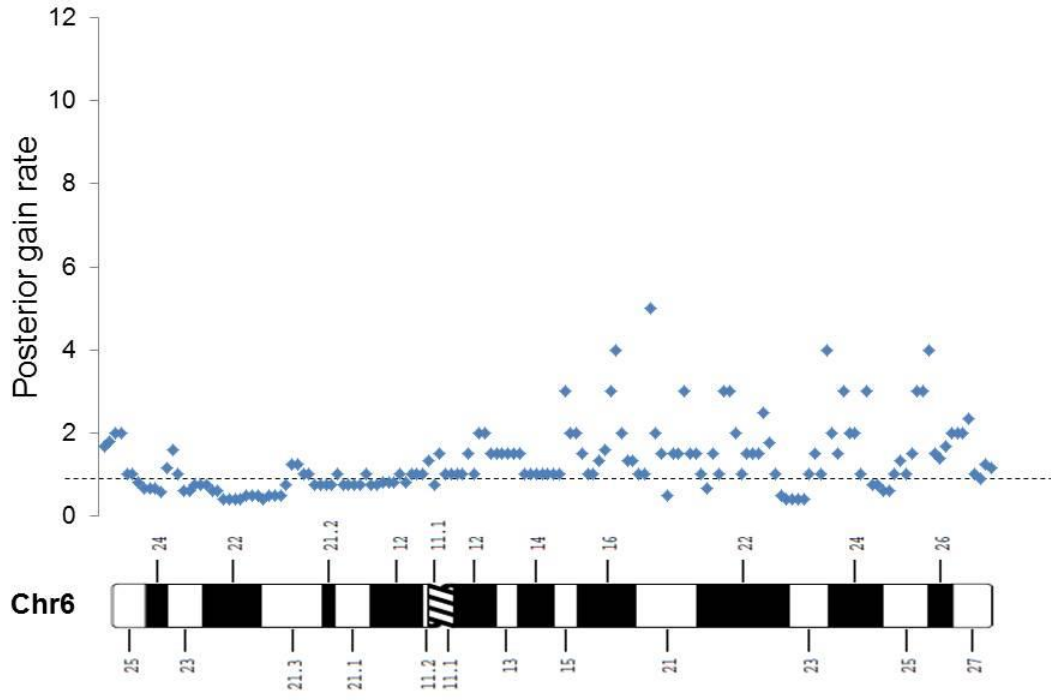

f

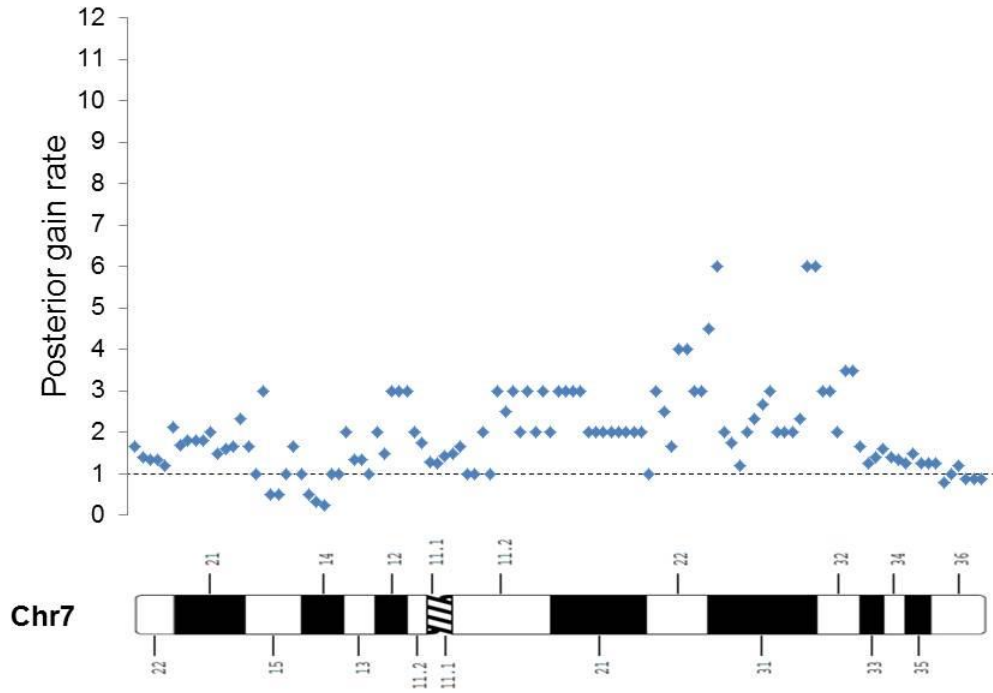

g

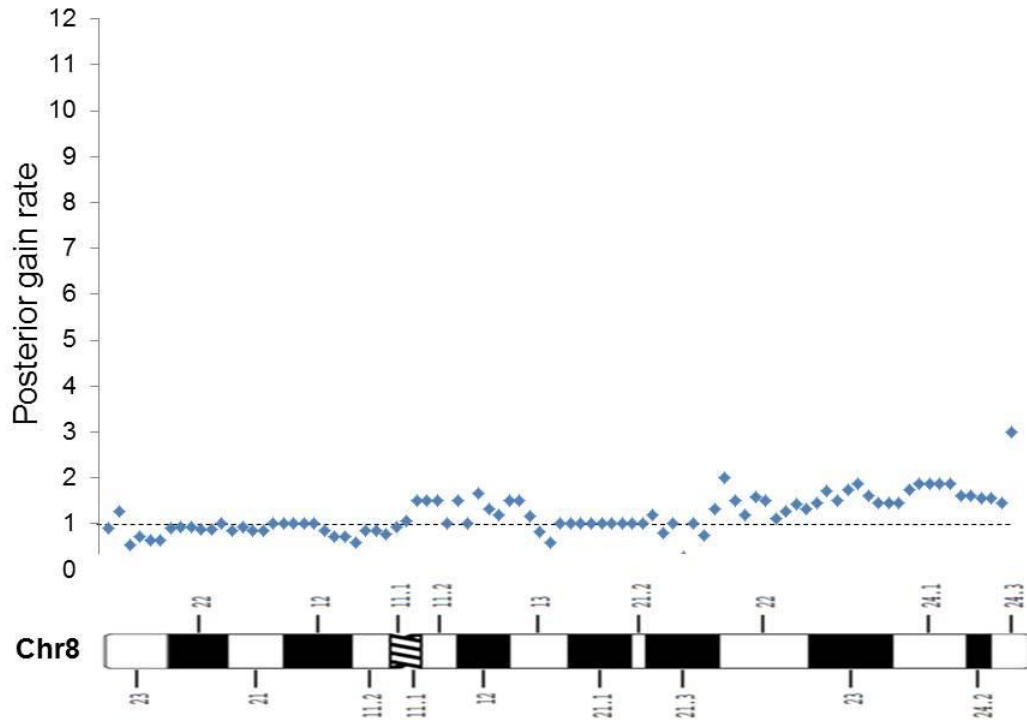

h

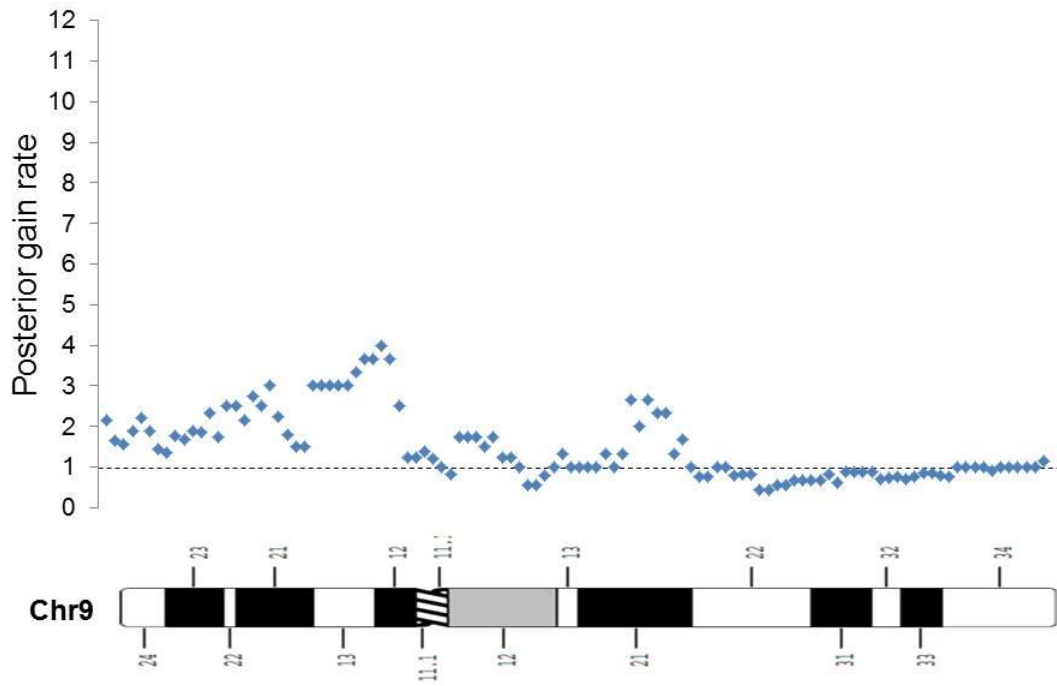

i

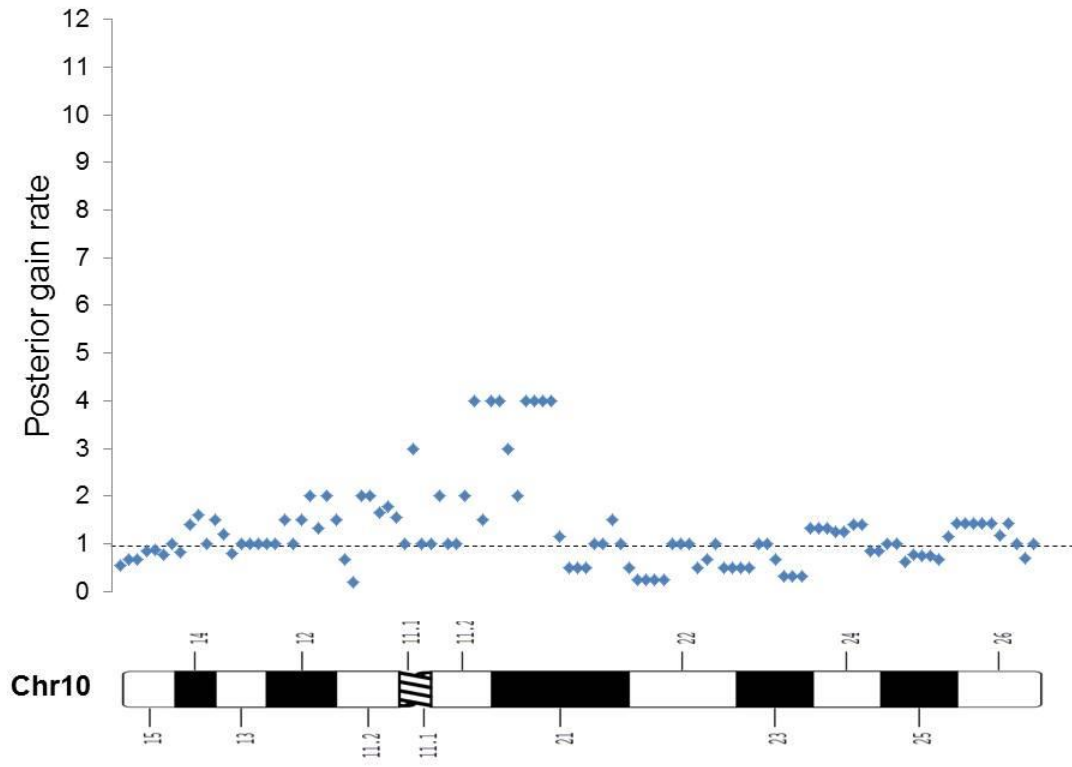

j

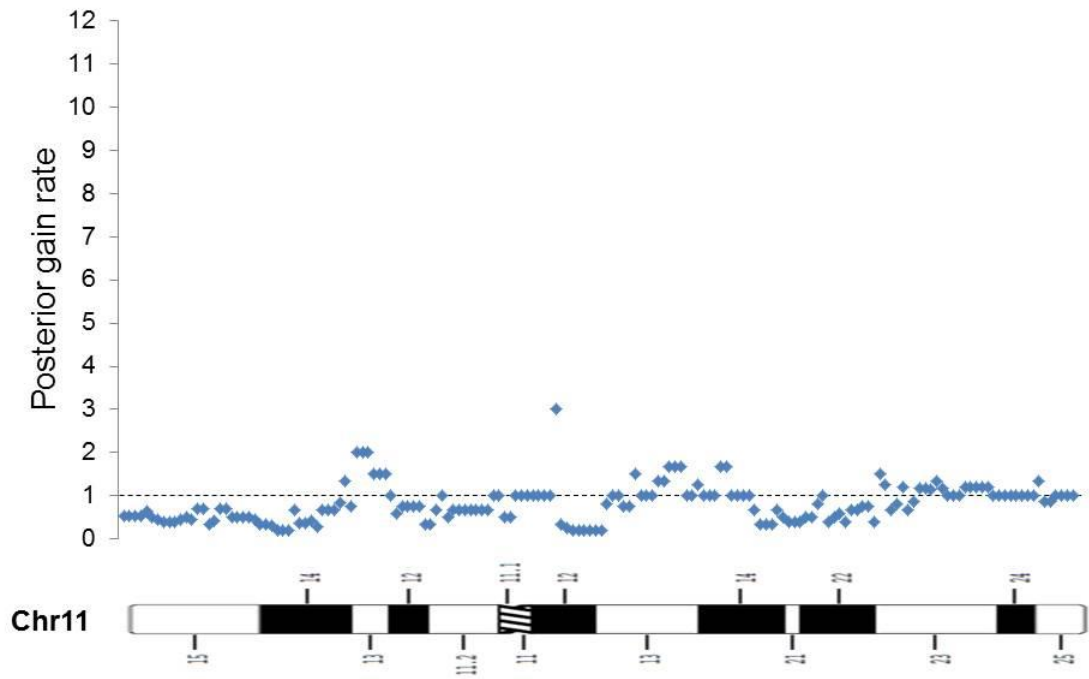

**k**

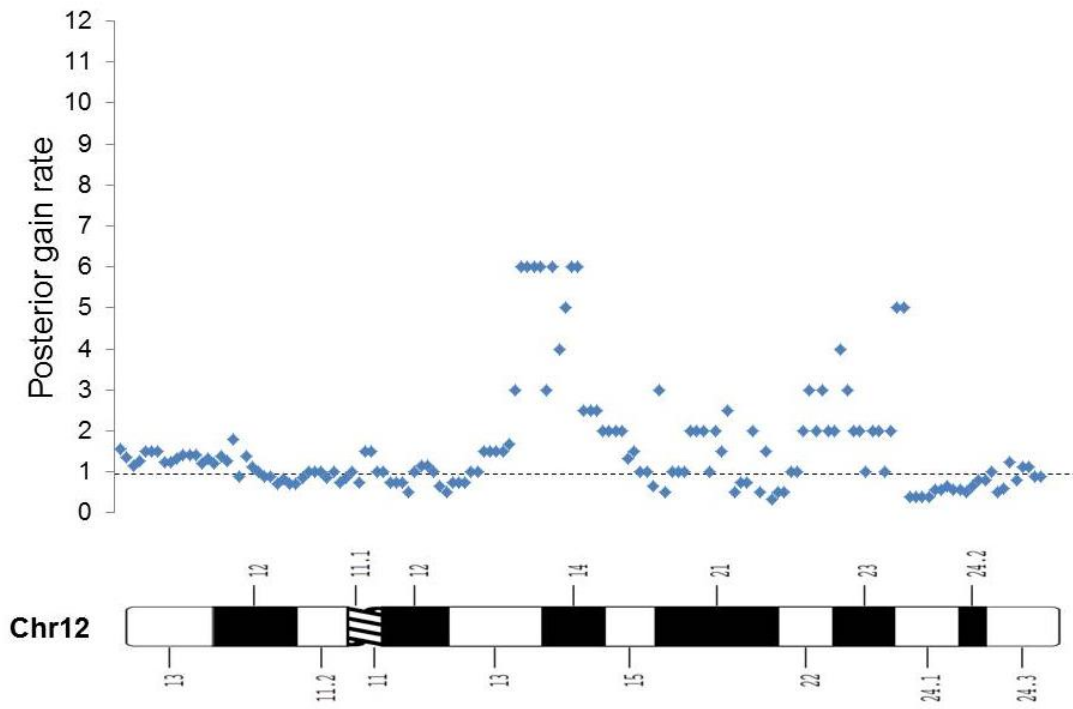

**l**

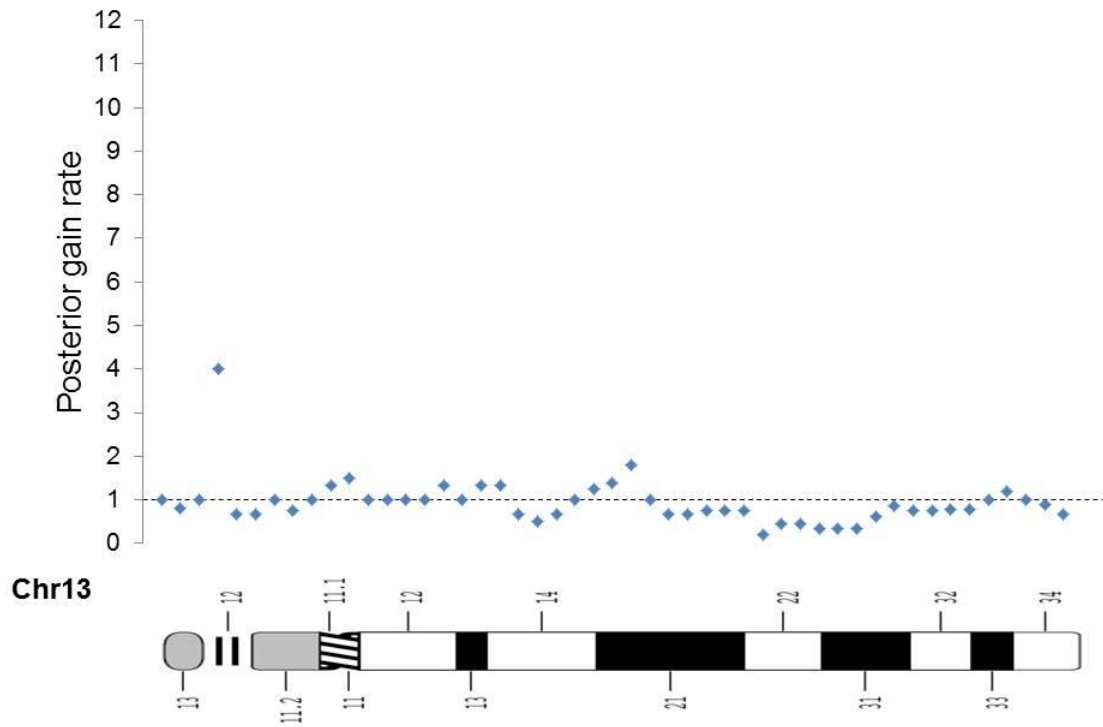



o

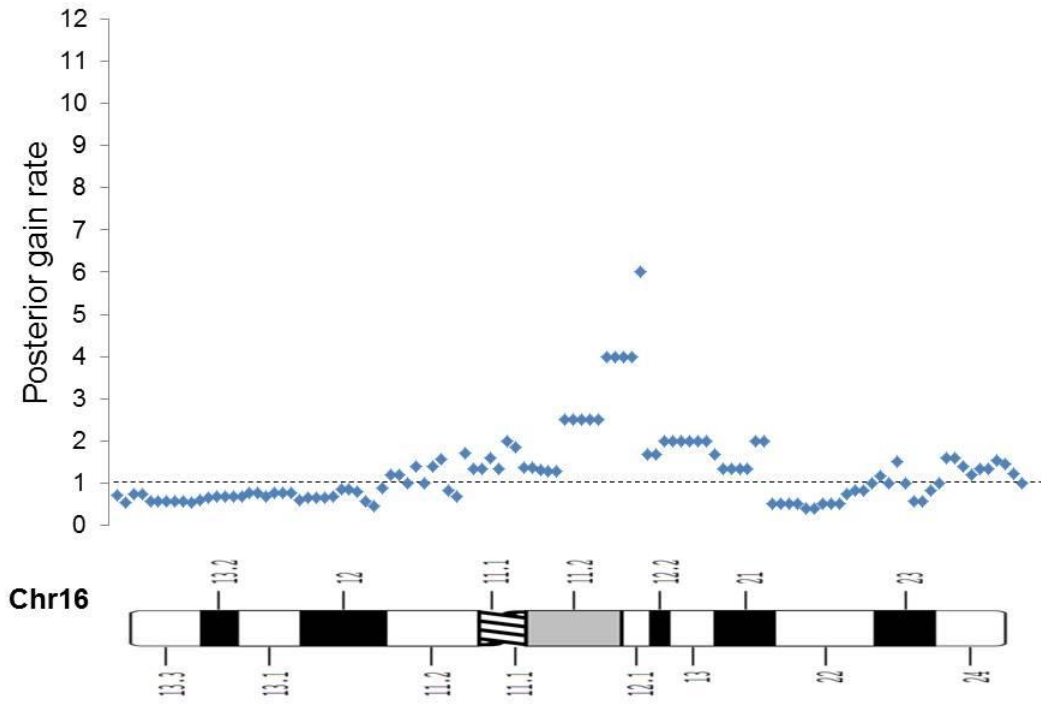

p

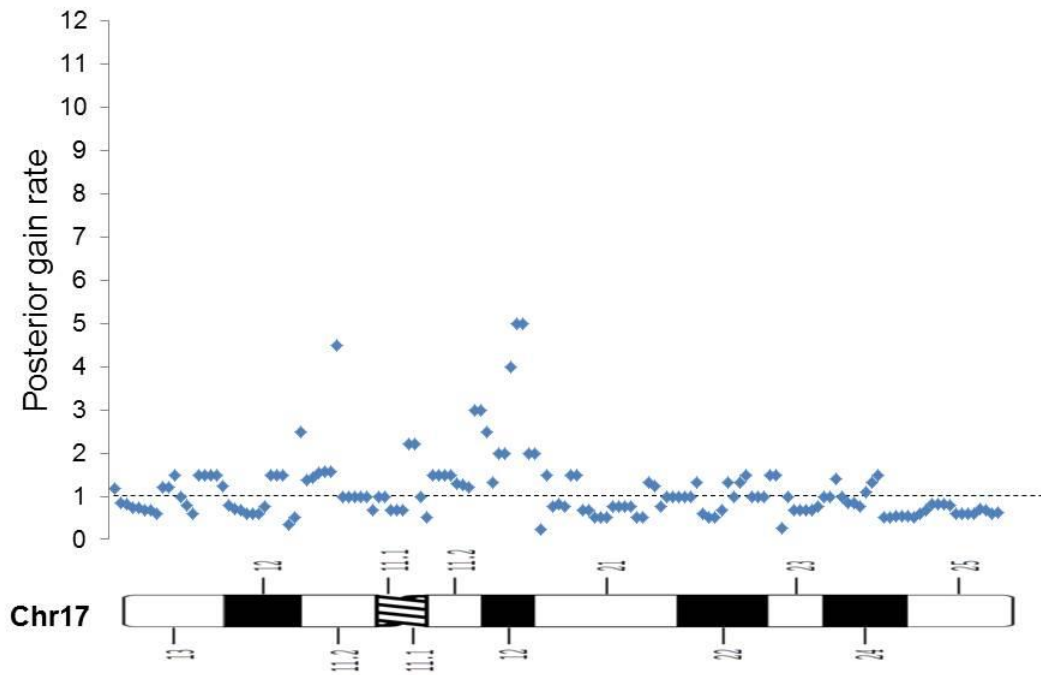





s

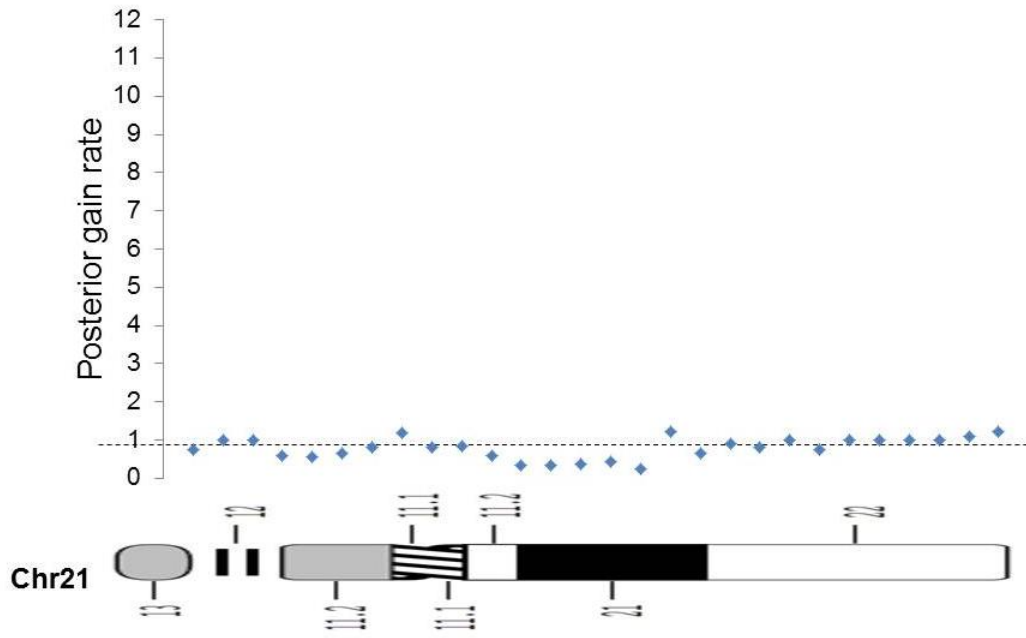

t

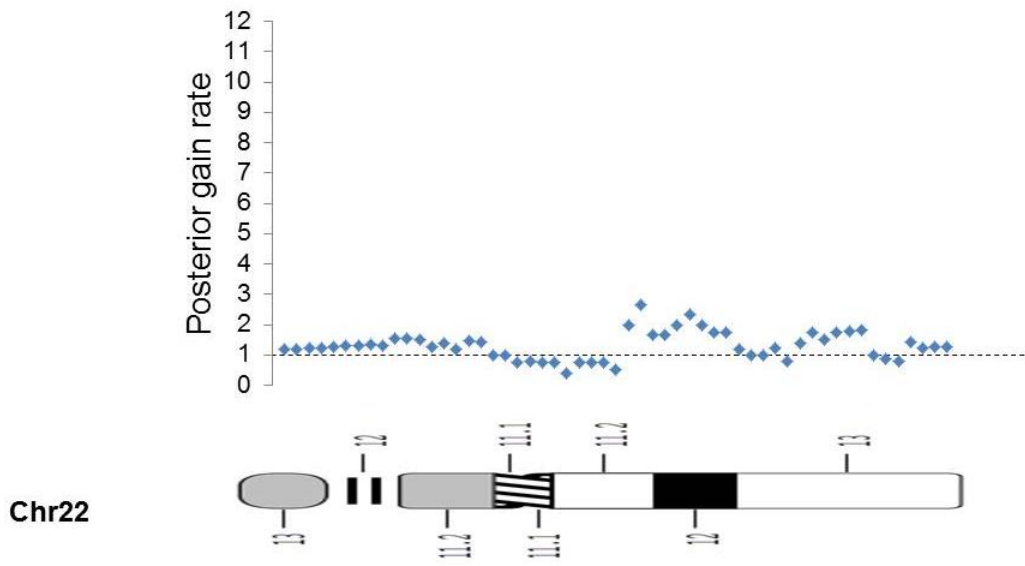

**Figure S2. Permutation testing reveals that skewing at 19p region is highly significant ( $p < 10^{-11}$ ). Furthermore, even after  $10^7$  random simulations we have calculated that it would require  $10^4$ - $10^5$  more simulation to observe such a skewing at least once.**

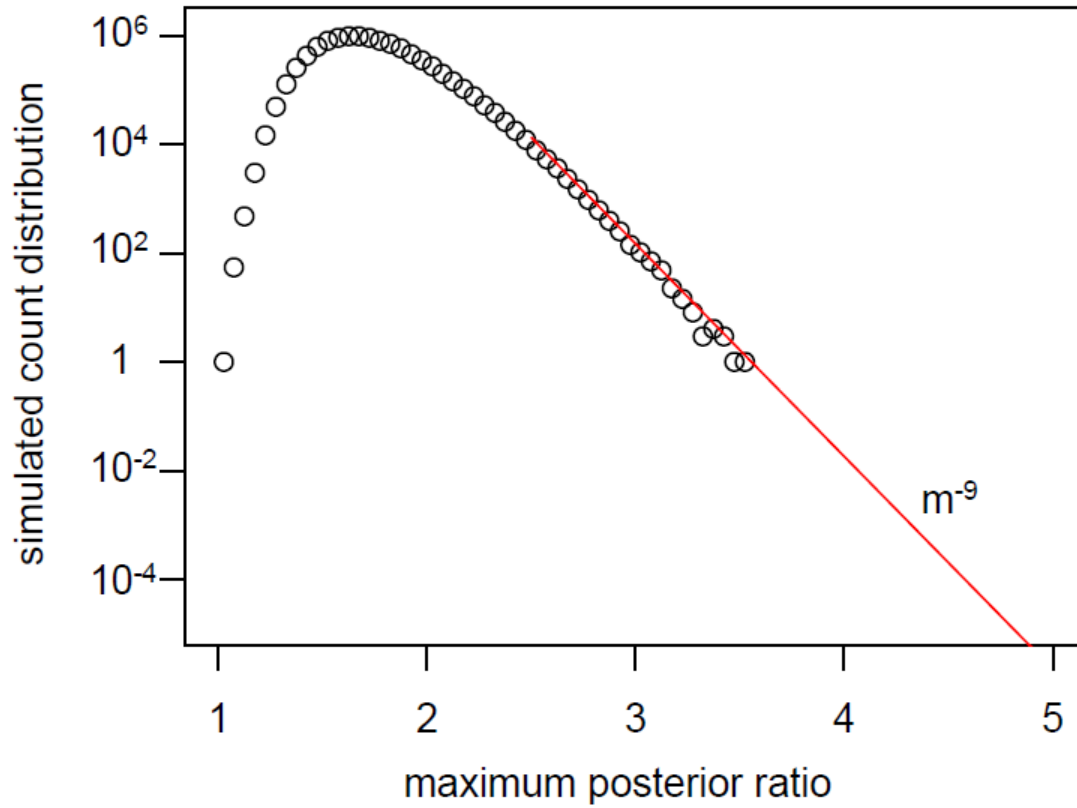



**Table S1** (related to Figure 3). Details of data in Figure 3, including sex ratio of total variants, duplications and deletions, and number of genes assayed on Chromosome 19 in 500 KB bins.

| Chromosome Band | Regional Bin |             | Total Variants |    | Duplications |    | Deletions |    | Number of Genes      |
|-----------------|--------------|-------------|----------------|----|--------------|----|-----------|----|----------------------|
|                 | Start (KB)   | Finish (KB) | F              | M  | F            | M  | F         | M  |                      |
| 19p13.3         | 100,000      | 500,000     | 11             | 15 | 2            | 7  | 6         | 5  | 15                   |
|                 | 500,000      | 1,000,000   | 15             | 18 | 4            | 10 | 6         | 4  | 27                   |
|                 | 1,000,000    | 1,500,000   | 15             | 21 | 2            | 11 | 6         | 4  | 28                   |
|                 | 1,500,000    | 2,000,000   | 5              | 20 | 1            | 13 | 1         | 3  | 19                   |
|                 | 2,000,000    | 2,500,000   | 16             | 15 | 4            | 13 | 4         | 0  | 22                   |
|                 | 2,500,000    | 3,000,000   | 10             | 15 | 4            | 11 | 4         | 2  | 14                   |
|                 | 3,000,000    | 3,500,000   | 15             | 18 | 5            | 9  | 9         | 5  | 10                   |
|                 | 3,500,000    | 4,000,000   | 17             | 26 | 3            | 10 | 13        | 10 | 25                   |
| 19p13.3         | 4,000,000    | 4,500,000   | 19             | 26 | 2            | 10 | 13        | 11 | 19                   |
| 19 p13.3        | 4,500,000    | 5,000,000   | 20             | 22 | 1            | 13 | 9         | 7  | 17<br>UHRF1          |
| 19p13.3         | 5,000,000    | 5,500,000   | 2              | 17 | 1            | 11 | 2         | 3  | 5<br>KDM4B PTPRS     |
| 19p13.3         | 5,500,000    | 6,000,000   | 1              | 14 | 1            | 10 | 0         | 2  | 20                   |
| 19p13.3         | 6,000,000    | 6,500,000   | 1              | 8  | 1            | 8  | 0         | 0  | 15                   |
| 19p13.3 & 13.2  | 6,500,000    | 7,000,000   | 4              | 11 | 1            | 10 | 0         | 0  | 12                   |
| 19p13.2         | 7,000,000    | 7,500,000   | 6              | 10 | 1            | 10 | 1         | 0  | 7                    |
| 19p13.2         | 7,500,000    | 8,000,000   | 3              | 8  | 1            | 5  | 1         | 0  | 30                   |
|                 | 8,000,000    | 8,500,000   | 2              | 5  | 1            | 4  | 1         | 1  | 14                   |
| 19p13.2         | 8,500,000    | 9,000,000   | 4              | 5  | 1            | 4  | 0         | 0  | 12                   |
| 19p13.2         | 9,000,000    | 9,500,000   | 1              | 5  | 1            | 4  | 0         | 0  | 21                   |
| 19p13.2         | 9,500,000    | 10,000,000  | 1              | 7  | 1            | 5  | 0         | 0  | 16<br>7ZNFFBx12;UBL5 |
| 19p13.2         | 10,000,000   | 10,500,000  | 3              | 6  | 0            | 4  | 3         | 0  | 11<br>DNMT1          |
| 19p13.2         | 10,500,000   | 11,000,000  | 6              | 9  | 0            | 6  | 5         | 1  | 22                   |
| 19p13.2         | 11,000,000   | 11,500,000  | 14             | 13 | 1            | 5  | 4         | 0  | 18                   |

|                     |            |            |    |    |   |    |   |   |                                                                    |
|---------------------|------------|------------|----|----|---|----|---|---|--------------------------------------------------------------------|
|                     |            |            |    |    |   |    |   |   | 166kb dup mat inherited                                            |
| midpoint<br>19p13.2 | 11,500,000 | 12,000,000 | 4  | 11 | 0 | 7  | 3 | 3 | 20<br>3 ZNF ELAV 3 SWSAP1                                          |
| 19p13.2             | 12,000,000 | 12,500,000 | 4  | 13 | 0 | 7  | 2 | 3 | 19<br>13 ZNF cluster                                               |
| 19p13.2             | 12,500,000 | 13,000,000 | 8  | 11 | 4 | 10 | 1 | 4 | 27<br>6 ZNF                                                        |
| 19p13.2             | 13,500,000 | 14,000,000 | 14 | 10 | 3 | 5  | 7 | 3 | 13                                                                 |
| 19p13.2             | 14,000,000 | 14,500,000 | 11 | 9  | 2 | 6  | 6 | 2 | 16                                                                 |
| 19p13.12            | 14,500,000 | 15,000,000 | 22 | 10 | 3 | 6  | 6 | 3 | 22<br>ZNF 333                                                      |
|                     | 15,000,000 | 15,500,000 | 9  | 10 | 2 | 4  | 5 | 5 | 17                                                                 |
|                     | 15,500,000 | 16,000,000 | 9  | 6  | 2 | 3  | 5 | 2 | 20                                                                 |
| 19p13.11            | 16,000,000 | 16,500,000 | 6  | 5  | 1 | 2  | 2 | 2 | 16                                                                 |
|                     | 16,500,000 | 17,000,000 | 3  | 6  | 1 | 1  | 0 | 2 | 13                                                                 |
|                     | 17,000,000 | 17,500,000 | 3  | 5  | 1 | 2  | 0 | 1 | 18                                                                 |
|                     | 17,500,000 | 18,000,000 | 5  | 5  | 1 | 2  | 0 | 1 | 17                                                                 |
|                     | 18,000,000 | 18,500,000 | 3  | 4  | 1 | 2  | 1 | 2 | 22                                                                 |
|                     | 18,500,000 | 19,000,000 | 19 | 5  | 2 | 2  | 1 | 2 | 17<br>many females with 142kb gain<br>inherited from normal parent |
|                     | 19,000,000 | 19,500,000 | 5  | 3  | 2 | 1  | 2 | 2 | 22                                                                 |
|                     | 19,500,000 | 20,000,000 | 1  | 4  | 1 | 2  | 0 | 1 | 16                                                                 |
|                     | 20,000,000 | 20,500,000 | 2  | 6  | 1 | 2  | 0 | 2 | 6<br>5 ZNF                                                         |
|                     | 20,500,000 | 21,000,000 | 3  | 7  | 1 | 5  | 1 | 1 | 8<br>2 ZNF                                                         |
|                     | 21,000,000 | 21,500,000 | 3  | 6  | 1 | 4  | 1 | 1 | 13<br>5 ZNF                                                        |
|                     | 21,500,000 | 22,000,000 | 1  | 5  | 1 | 3  | 0 | 1 | 8<br>3 ZNF:                                                        |
| 19p12               | 22,500,000 | 23,000,000 | 1  | 4  | 1 | 2  | 0 | 1 | 10<br>3 ZNF                                                        |

|              |            |            |    |    |   |   |   |   |               |
|--------------|------------|------------|----|----|---|---|---|---|---------------|
|              | 23,000,000 | 23,500,000 | 1  | 4  | 1 | 2 | 0 | 1 | 9<br>3 ZNF    |
|              | 23,500,000 | 24,000,000 | 3  | 11 | 2 | 3 | 0 | 5 | 8<br>3 ZNF    |
|              | 24,000,000 | 24,500,000 | 3  | 11 | 2 | 3 | 1 | 5 | 6<br>2 ZNF    |
| 19p11        | 24,500,000 | 25,000,000 | 2  | 3  | 1 | 2 | 0 | 0 | 0             |
|              | 25,000,000 | 25,500,000 | 1  | 2  | 0 | 1 | 0 | 0 | 0             |
|              | 25,500,000 | 26,000,000 | 1  | 2  | 0 | 2 | 0 | 0 | 0             |
|              | 26,000,000 | 26,500,000 | 1  | 2  | 0 | 2 | 0 | 0 | 0             |
| CENTROMERE   | 26,500,000 | 27,000,000 | 1  | 2  | 0 | 2 | 0 | 0 | 0             |
| 19q11        | 27,000,000 | 27,500,000 | 1  | 2  | 0 | 2 | 0 | 0 | 0             |
|              | 27,500,000 | 28,000,000 | 2  | 2  | 0 | 2 | 0 | 0 | 0             |
|              | 28,000,000 | 28,500,000 | 6  | 7  | 1 | 4 | 0 | 1 | 2             |
|              | 28,500,000 | 29,000,000 | 5  | 7  | 1 | 4 | 0 | 1 | 0             |
| 19q12        | 29,000,000 | 29,500,000 | 2  | 5  | 1 | 3 | 0 | 1 | 2             |
|              | 29,500,000 | 30,000,000 | 3  | 6  | 1 | 4 | 1 | 1 | 2             |
|              | 30,000,000 | 30,500,000 | 6  | 7  | 3 | 5 | 1 | 1 | 7             |
|              | 30,500,000 | 31,000,000 | 20 | 13 | 3 | 6 | 1 | 2 | 3             |
|              | 31,000,000 | 31,500,000 | 21 | 12 | 3 | 5 | 2 | 4 | 1             |
| 19q12        | 31,500,000 | 32,000,000 | 7  | 12 | 3 | 4 | 2 | 7 | 1             |
| 19q12-q13.11 | 32,000,000 | 32,500,000 | 5  | 13 | 2 | 5 | 1 | 6 | 2             |
|              | 32,500,000 | 33,000,000 | 5  | 13 | 2 | 5 | 1 | 6 | 3             |
| 19q13.11     | 33,000,000 | 33,500,000 | 4  | 13 | 2 | 4 | 2 | 7 | 13            |
|              | 33,500,000 | 34,000,000 | 4  | 12 | 2 | 5 | 2 | 5 | 11            |
|              | 34,000,000 | 34,500,000 | 4  | 9  | 2 | 4 | 2 | 4 | 5             |
|              | 34,500,000 | 35,000,000 | 9  | 10 | 2 | 5 | 5 | 3 | 12            |
|              | 35,000,000 | 35,500,000 | 8  | 8  | 1 | 4 | 5 | 2 | 12            |
|              | 35,500,000 | 36,000,000 | 6  | 8  | 1 | 3 | 3 | 3 | 25            |
|              | 36,000,000 | 36,500,000 | 6  | 9  | 1 | 3 | 2 | 2 | 36            |
|              | 36,500,000 | 37,000,000 | 6  | 7  | 1 | 3 | 3 | 1 | 17            |
|              | 37,000,000 | 37,500,000 | 5  | 8  | 1 | 3 | 2 | 3 | 12<br>10 ZNF: |

|                |            |            |    |    |   |   |   |   |                                        |
|----------------|------------|------------|----|----|---|---|---|---|----------------------------------------|
|                | 37,500,000 | 38,000,000 | 5  | 6  | 1 | 2 | 1 | 1 | 9<br>7 ZNF                             |
| 19q13.12- 13.2 | 38,000,000 | 38,500,000 | 4  | 4  | 1 | 2 | 1 | 0 | 19<br>WDR 87, 7 ZNF                    |
|                | 38,500,000 | 39,000,000 | 3  | 4  | 1 | 2 | 1 | 0 | 15                                     |
|                | 39,000,000 | 39,500,000 | 3  | 3  | 1 | 2 | 0 | 0 | 19<br>SIRT2, HNRNPL                    |
|                | 39,500,000 | 40,000,000 | 3  | 4  | 1 | 2 | 0 | 0 | 24<br>FBOXP, ZNFRP                     |
|                | 40,000,000 | 40,500,000 | 1  | 4  | 1 | 3 | 0 | 0 | 16<br>DYRK1B, LEUTX                    |
|                | 40,500,000 | 41,000,000 | 1  | 6  | 1 | 3 | 0 | 0 | 18                                     |
|                | 41,000,000 | 41,500,000 | 0  | 9  | 0 | 5 | 0 | 0 | 22<br>SHKBP1,SNRPA, RAB4B,<br>C19ORF54 |
|                | 41,500,000 | 42,000,000 | 0  | 4  | 0 | 1 | 0 | 0 | 21<br>TGFB1,HNRPUL1,CCDC97             |
|                | 42,000,000 | 42,500,000 | 7  | 5  | 0 | 1 | 1 | 0 | 18                                     |
|                | 42,500,000 | 43,000,000 | 5  | 3  | 1 | 2 | 2 | 1 | 19<br>2Z NF, OCT2                      |
|                | 43,000,000 | 43,500,000 | 3  | 4  | 1 | 3 | 1 | 1 | 15                                     |
|                | 43,500,000 | 44,000,000 | 4  | 1  | 1 | 1 | 1 | 0 | 15                                     |
|                | 44,000,000 | 44,500,000 | 2  | 1  | 1 | 1 | 0 | 0 | 21<br>8 ZNF                            |
|                | 44,500,000 | 45,000,000 | 1  | 1  | 0 | 1 | 0 | 0 | 20<br>15 ZNF                           |
|                | 45,000,000 | 45,500,000 | 1  | 6  | 0 | 1 | 0 | 0 | 19                                     |
|                | 45,500,000 | 46,000,000 | 12 | 10 | 3 | 3 | 0 | 0 | 22                                     |
| 19q13.32       | 46,000,000 | 46,500,000 | 3  | 6  | 1 | 1 | 0 | 2 | 25                                     |
|                | 46,500,000 | 47,000,000 | 4  | 5  | 1 | 3 | 0 | 2 | 18                                     |
|                | 47,000,000 | 47,500,000 | 6  | 7  | 2 | 2 | 1 | 2 | 16                                     |
|                | 47,500,000 | 48,000,000 | 10 | 8  | 6 | 3 | 1 | 2 | 18                                     |
|                | 48,000,000 | 48,500,000 | 22 | 11 | 8 | 3 | 1 | 2 | 16                                     |



|               |            |            |    |    |    |    |   |   |               |
|---------------|------------|------------|----|----|----|----|---|---|---------------|
|               | 48,500,000 | 49,000,000 | 19 | 10 | 7  | 4  | 0 | 0 | 17<br>ZNF114  |
|               | 49,000,000 | 49,500,000 | 5  | 4  | 5  | 3  | 0 | 0 | 30            |
|               | 49,500,000 | 50,000,000 | 10 | 2  | 8  | 2  | 0 | 0 | 40            |
|               | 50,000,000 | 50,500,000 | 10 | 3  | 5  | 2  | 0 | 1 | 35            |
|               | 50,500,000 | 51,000,000 | 12 | 8  | 5  | 5  | 0 | 2 | 14            |
|               | 51,000,000 | 51,500,000 | 6  | 8  | 5  | 4  | 0 | 3 | 24            |
|               | 51,500,000 | 52,000,000 | 6  | 6  | 5  | 2  | 0 | 3 | 30            |
|               | 52,000,000 | 52,500,000 | 7  | 13 | 5  | 8  | 0 | 3 | 25<br>6 ZNF   |
| q13.41        | 52,500,000 | 53,000,000 | 12 | 15 | 6  | 9  | 2 | 1 | 17<br>13 ZNF  |
|               | 53,000,000 | 53,500,000 | 8  | 10 | 7  | 6  | 1 | 1 | 16<br>10 ZNF: |
|               | 53,500,000 | 54,000,000 | 7  | 12 | 5  | 7  | 2 | 2 | 24<br>10 ZNF  |
|               | 54,000,000 | 54,500,000 | 9  | 12 | 8  | 11 | 1 | 0 | 70            |
|               | 54,500,000 | 55,000,000 | 14 | 18 | 11 | 10 | 0 | 0 | 29            |
|               | 55,000,000 | 55,500,000 | 14 | 17 | 11 | 10 | 0 | 0 | 29            |
| 19q13.42      | 55,500,000 | 56,000,000 | 7  | 11 | 6  | 6  | 1 | 2 | 26            |
| 19q42- q13.43 | 56,000,000 | 56,500,000 | 12 | 15 | 8  | 10 | 1 | 0 | 22<br>7 ZNF   |
| 19q13.43      | 56,500,000 | 57,000,000 | 11 | 18 | 9  | 13 | 1 | 0 | 16<br>7 ZNF   |
| 19q13.43      | 57,000,000 | 57,500,000 | 9  | 13 | 8  | 10 | 1 | 0 | 12<br>6 ZNF   |
|               | 57,500,000 | 58,000,000 | 7  | 11 | 7  | 7  | 0 | 1 | 19<br>10 ZNF  |
|               | 58,000,000 | 58,500,000 | 7  | 10 | 6  | 4  | 1 | 0 | 24<br>21 ZNF  |
|               | 58,500,000 | 59,000,000 | 6  | 8  | 5  | 4  | 0 | 0 | 29<br>15 ZNF  |
